# Supplementary material for: Design of a Novel Multifunction Decision Support Display for Anesthesia Care: AlertWatch® OR
Source: PubMed Central journal article supplement (PMC5799913; doi:10.1186/s12871-018-0478-8), 2018-02-05
Supplement: 12871_2018_478_MOESM2_ESM.pdf [file 12871_2018_478_MOESM2_ESM.pdf]

## Additional File 2. List of Text Alerts

| Category    | Alert Description                                                                                                                                  |
|-------------|----------------------------------------------------------------------------------------------------------------------------------------------------|
| Census      | ASA 4                                                                                                                                              |
| Census      | ASA 5                                                                                                                                              |
| Census      | Patient on Bypass                                                                                                                                  |
| Census      | Isolation precaution                                                                                                                               |
| Drugs       | Antibiotic last documented X minutes prior to surgical incision, where $X \geq 60$ or 120, depending on the drug.                                  |
| Drugs       | Antibiotic last documented X hours ago, where X varies by drug.                                                                                    |
| Drugs       | Antibiotic has not been documented prior to surgical incision.                                                                                     |
| Drugs       | Pure TIVA documented. NMB given. Consider BIS or nitrous oxide.                                                                                    |
| Drugs       | Consider documenting train of four.                                                                                                                |
| Drugs       | Reversal administered without TOF documentation.                                                                                                   |
| Drugs       | High cumulative vasopressor bolus dose, for vasopressors other than Epinephrine.                                                                   |
| Drugs       | High cumulative vasopressor bolus dose, for Epinephrine bolus.                                                                                     |
| Glucose     | No glucose recorded (for patient with diabetes).                                                                                                   |
| Glucose     | Glucose = X, where $X < 60$ .                                                                                                                      |
| Glucose     | Glucose = X, where $X \geq 200$ . Consider starting insulin infusion 0.02 units / kg / hr, with a max of 1 unit / hr.                              |
| Glucose     | Glucose = X, where $X \geq 300$ . Consider starting insulin infusion 0.04 units / kg / hr, with a max of 2 units / hr.                             |
| Glucose     | Glucose = X, where $X \geq 350$ . Consider starting insulin infusion 0.06 units / kg / hr, with a max of 3 units / hr.                             |
| Glucose     | Insulin infusion/bolus. Consider measuring glucose.                                                                                                |
| Heart       | Hct = X, where $X < 21$ . Consider transfusion.                                                                                                    |
| Heart       | Hct = X, where $X < 18$ . Consider immediate transfusion                                                                                           |
| Heart       | Consider measuring hematocrit, when estimated Hct < 21.                                                                                            |
| Heart       | X% of EBV transfused. Consider checking coagulation profile. Treat with [Ca <sup>++</sup> , Cryoprecipitate, FFP, Platelets].                      |
| Heart       | Ca <sup>++</sup> given X minutes ago, where $X \geq 60$ . Consider measuring Ca <sup>++</sup> .                                                    |
| Heart       | Cryoprecipitate given X minutes ago, where $X \geq 60$ . Consider measuring Fibrinogen.                                                            |
| Heart       | FFP given X minutes ago, where $X \geq 60$ . Consider measuring INR.                                                                               |
| Heart       | Platelets given X minutes ago, where $X \geq 60$ . Consider measuring platelet count.                                                              |
| Heart       | Ca <sup>++</sup> = X mmol/L, where $X < 1$ . Consider treating with 2 to 4 grams of calcium gluconate.                                             |
| Heart       | Fibrinogen = X mg/dL, where $X < 100$ . Consider treating with cryoprecipitate.                                                                    |
| Heart       | INR = X, where $X \geq 1.5$ . Consider treating with FFP.                                                                                          |
| Heart       | Platelet count = X, where $X < 100k$ . Consider treating with platelets.                                                                           |
| Heart       | Consider measuring SPV or PPV.                                                                                                                     |
| Heart       | SPV/PPV is X minutes old, where $X \geq 30$ .                                                                                                      |
| Heart       | EBL = X% of EBV, where $X \geq 20$ . Consider objective measure of fluid status, e.g., SPV, CVP.                                                   |
| Heart       | EBL = X% of EBV, where $X \geq 40$ . Consider objective measure of fluid status, e.g., SPV, CVP.                                                   |
| Heart       | Bradycardia, where heart rate below age defined limits.                                                                                            |
| Heart       | Bradycardia, where heart rate below age-defined limits.                                                                                            |
| Heart       | Tachycardia, where heart rate above age-defined limits.                                                                                            |
| Heart       | Tachycardia, where heart rate above age-defined limits.                                                                                            |
| Heart       | Potential unrecognized blood loss. Consider measuring Hct.                                                                                         |
| Hypotension | No BP Cuff measurement for more than 5 minutes.                                                                                                    |
| Hypotension | No BP Cuff for 10 minutes or more.                                                                                                                 |
| Hypotension | No BP Cuff for 15 minutes or more for pediatric patients on a-line.                                                                                |
| Hypotension | Potential hypotension, based on the slope of the last two measurements.                                                                            |
| Hypotension | Hypotension: MAP = X, where $X = 55$ for adults or $2 \times \text{age} + 25$ for children.                                                        |
| Hypotension | Cumulative time for MAP < 55 more than 10 minutes (adults only).                                                                                   |
| Hypotension | Hypotension: MAP = X, where $X = 60$ for adults or $2 \times \text{age} + 30$ for children.                                                        |
| Lungs       | PEEP = X, where $X < 4$ .                                                                                                                          |
| Lungs       | CO2 Rebreathing. Inspired CO2 = X mm Hg, where $X \geq 5$ .                                                                                        |
| Lungs       | Tidal volume = X (Y cc/kilo of ideal body weight), where $Y < 2$ or $Y > 10$ . Consider changing tidal volume to 6-8 cc/kilo of ideal body weight. |
| Lungs       | Tidal volume has been low/high for > 10 minutes.                                                                                                   |
| Other       | Potentially invalid data. Check primary source.                                                                                                    |
| Other       | You are in room X, but viewing room Y.                                                                                                             |

You can silence the alarm for the duration of the current case by clicking on the speaker icon. An X in a message is replaced with the current value. All text alerts have received FDA clearance.

\*Scrolling Red Text
