# Supplementary material for: Design of a Novel Multifunction Decision Support Display for Anesthesia Care: AlertWatch® OR
Source: Springer Nature journal article supplement (doi:10.1186/s12871-018-0478-8), 2018-02-05
Supplement: MOESM1 [file 15442754]

Additional File I. List of Color Limits

| Area    | Variable                      | Low Red | Low Yellow | Green  | High Yellow | High Red |
|---------|-------------------------------|---------|------------|--------|-------------|----------|
| Brain   | BIS                           | < 20    | < 40       | < 60   | < 70        | ≥ 70     |
|         | MAC                           | < 0.5   | < 0.7      | ≥ 0.7  |             |          |
| General | Glucose                       | < 60*   | < 70       | < 200  | < 300       | ≥ 300    |
|         | Hematocrit                    | < 18*   | < 24       | ≥ 24   |             |          |
|         | Hemoglobin                    | < 6*    | < 8        | ≥ 8    |             |          |
|         | INR                           | < 0     | < 0        | < 1.3  | < 1.5       | ≥ 1.5    |
|         | Platelet Count                | < 50    | < 100      | ≥ 100  |             |          |
|         | Potassium                     | < 3     | < 3.5      | < 5    | < 5.5       | ≥ 5.5    |
|         | Temperature                   | < 35    | < 36       | < 37.5 | < 38        | ≥ 38     |
|         |                               |         |            |        |             |          |
| Heart   | BP MAP                        | < 55*   | < 60       | < 130  | < 150       | ≥ 150    |
|         | CVP                           | < 2     | < 5        | < 15   | < 20        | ≥ 20     |
|         | I/O Balance (Fraction of EBV) | < -0.4  | < -0.2     | < 0.2  | < 0.4       | ≥ 0.4    |
|         | PAP Dias                      | < 5     | < 9        | < 18   | < 24        | ≥ 24     |
|         | PPV                           | > 19    | > 15       | > 7    | > 3         | ≤ 3      |
|         | SPV                           | > 15    | > 10       | > 3.9  | > 2         | ≤ 2      |
|         | SVV                           | > 20    | > 15       | > 10   | > 5         | ≤ 5      |
| Kidneys | Creatinine                    | < 0     | < 0        | < 1.2  | < 1.5       | ≥ 1.5    |
|         | Urine                         | < 0     | < 0.5      | ≥ 0.5  |             |          |
| Liver   | Albumin                       | < 0     | < 3        | < 5.3  | ≥ 5.3       |          |
|         | ALP                           | < 0     | < 0        | < 120  | ≥ 120       |          |
|         | ALT / SGPT                    | < 0     | < 0        | < 52   | ≥ 52        |          |
|         | Amylase                       | < 0     | < 0        | < 110  | ≥ 110       |          |
|         | AST / SGOT                    | < 0     | < 0        | < 35   | ≥ 35        |          |
|         | GGT                           | < 0     | < 0        | < 85   | ≥ 85        |          |
|         | Lipase                        | < 0     | < 0        | < 60   | ≥ 60        |          |
| Lungs   | CO2                           | < 20    | < 30       | < 50   | < 60        | ≥ 60     |
|         | PEEP                          | < 0     | < 0        | < 11   | < 15        | ≥ 15     |
|         | PIP                           | < 0     | < 0        | < 30   | < 40        | ≥ 40     |
|         | SpO2                          | < 90    | < 93       | ≥ 93   |             |          |

Generally, a color (level) is assigned if the measured value is **less** than the entry in the table. High red is assigned when the measured value is **greater than or equal to** the entry for High Yellow. \* Indicates flashing red square on census view, scrolling red alert on patient view and optional page to provider.
